# Supplementary material
Source: publisher figshare collection journal article supplement (https://rs.figshare.com/ndownloader/files/12835280)
Supplement: Supplementary file 1 [file 12835280]

**Supplementary Table 2**. Summary of analysis of skeletal patterns (*Col2a1* expression) in five sham (PBS) electroporated embryos.

| **Specimen** | **Skeletal pattern** | **Stage when electroporated** | **Stage of sham EP limb** | **Stage of contralateral non-EP limb** |
| --- | --- | --- | --- | --- |
| 1 | normal | HH25 | HH26 | HH26 |
| 2 | normal | HH24 | HH26/27 | HH27 |
| 3 | normal | HH26 | HH27 | HH27 |
| 4 | normal | HH25 | HH27/28 | HH28 |
| 5 | normal | HH26 | HH28/29 | HH29 |
